# Supplementary material for: Inducing Mitotic Catastrophe as a Therapeutic Approach to Improve Outcomes in Ewing Sarcoma
Source: MDPI journal article supplement (doi:10.3390/cancers15204911), 2023-10-10
Supplement: s1 [file s1]

## **SUPPLEMENTARY FIGURE LEGENDS**

**Supplementary Figure S1.** **A)** STRING protein-protein interaction analysis for the top-fifteen genes is represented. Gene enrichment analysis of the top-fifteen genes by FunRich 3.1.3 (Functional Enrichment Analysis Tool) software indicating the key **B)** biological pathways, and **C)** biological processes mediated by these genes. **D)** RNA expression of KIF11, AURKA, KIF15 and TPX2 from EWS patients were accessed from BioGPS.

**Supplementary Figure S2 (related to Figure 1B & C).** Quantification data of Wes blots.

**Supplementary Figure S3 (related to Figure 1B & C).** Full length Wes blots.

**Supplementary Figure S4.** Gene expression data for KIF11, AURKA, KIF15 and TPX2 from The Genotype-Tissue Expression (GTEx) portal (<https://gtexportal.org/home/>) accessed on 3 October 2023.

**Supplementary Figure S5.** Dose-response curves, dose-response matrix, and heat map indicating synergy scores in different EWS cell lines. Combination treatment resulted in the following synergy scores in **A)** CHLA-9 (27.45), **B)** CHLA-32 (38.97), and **C)** TC-32 (31.28).

**Supplementary Figure S6.** Dose-response curves, dose-response matrix, and heat map indicating synergy scores in different cancer cell lines and control. Combination treatment resulted in the following synergy scores in **A)** U2-OS (17.91), **B)** CRL-2061 (13.16), and **C)** BMD-MSCs - control (13.04).

**Supplementary Figure S7 (related To Figure 6A & B).** Quantification of Wes blot data for **Figure 6** is shown.

**Supplementary Figure S8 (related To Figure 6A).** Full length Wes blots.

**Supplementary Figure S9 (related To Figure 6B).** Full length Wes blots.

**Supplementary Figure S10. A)** Timeline of in vivo study is represented. SB-743921 (2.5 mg/kg) and VIC-1911 (37.5 mg/kg) were dosed intraperitoneally and orally respectively. Mice were treated with these drugs every other day for 20 days (11 treatments) and monitored until end-point criteria were met. We observed significant **B)** tumor regression (control vs combination and VIC-1911 vs combination,  $***p \leq 0.001$  as assessed by one-way ANOVA) and **C)** overall survival.  $***p \leq 0.001$  and  $**p \leq 0.01$  is determined by logrank (Mantel-cox) test and indicated on the graph.

**Supplementary Figure S11.** The body weights of mice are represented for the tumor efficacy **A)** efficacy Study 1 and **B)** efficacy Study 2.  $****p \leq 0.0001$ ,  $***p \leq 0.001$ ,  $**p \leq 0.01$  and  $*p \leq 0.05$  as measured by one-way ANOVA.
